# Supplementary material for: Development of a prognostic model incorporating a cuproptosis-related signature and CNN3 as a predictor in childhood acute myelocytic leukemia
Source: Front Oncol. 2024 Nov 1;14:1494777. doi: 10.3389/fonc.2024.1494777 (PMC11564170; doi:10.3389/fonc.2024.1494777)
Supplement: Supplementary file 2 [file Table2.xlsx]

## Sheet: Sheet1
Table S2. Gene symbol list of CRGs
ABCB7
ACO2
AOC3
ATOX1
ATP7A
ATP7B
CCL8
CCS
CD274
CDK5RAP1
CDKN2A
CISD1
CMC1
COA6
COX11
COX17
CP
CTR1
DBH
DBT
DLAT
DLD
DLK2
DLST
DNA2
DPYD
EFTDH
ELP3
FDX1
GCSH
GLRX5
GLS
GSS
H3C1
HIST1H3A
HSPA1A
ISCA2
LIAS
LIPT1
LIPT2
LOXL2
MAP2K1
MAP2K2
MT1A
MT1B
MT1E
MT1F
MT1G
MT1H
MT1M
MT1X
MT2A
MT-CO1
MT-CO2
MTCO2P12
MTF1
NFE2L2
NLRP3
NTHL1
PDE3B
PDHA1
PDHB
PDK1
PLOD1
POLE
PPAT
RBFOX1
SCO1
SCO2
SDHB
SLC25A3
SLC31A1
SLC31A2
SOD1
SURF1
TYR
UBE2D1
UBE2D2
UBE2D3
UBE2D4
ULK1
ULK2
VEGFA
VEGFA
