# Supplementary material for: Development of a prognostic model incorporating a cuproptosis-related signature and CNN3 as a predictor in childhood acute myelocytic leukemia
Source: Front Oncol. 2024 Nov 1;14:1494777. doi: 10.3389/fonc.2024.1494777 (PMC11564170; doi:10.3389/fonc.2024.1494777)
Supplement: Supplementary file 3 [file Table3.xlsx]

## Sheet: lasso.geneCoef
Table S3. Coefficient of risk genes
Gene	Coef
LGR4	0.456076
FERP1	0.0274748
C2orf88	0.0110913
PGAP1	0.171175
ACSM1	0.0205294
PRSS2	0.213052
IGHD4-17	0.414657
SNORD19C	0.111823
PSMD6-AS2	0.0231553
MIR553	0.000559579
SNRPGP4	0.0691216
CNN3	0.00859603
